# Supplementary material for: Possible seasonal and diurnal modulation of Gammarus pulex (Crustacea, Amphipoda) drift by microsporidian parasites
Source: PubMed Central journal article supplement (PMC10257654; doi:10.1038/s41598-023-36630-2), 2023-06-10
Supplement: 41598_2023_36630_MOESM1_ESM.pdf [file 41598_2023_36630_MOESM1_ESM.pdf]

**Table S1** Logistic regression output table from GLMs relative to factors (day/night, average flow velocity, and amphipod size) influencing microsporidians prevalence in *Gammarus pulex* clade E for each drift experiment and pooled experiment samples. The table includes coefficients, standard errors of coefficients, Z values, P values, Odd Ratios, Odd Ratios 95% confidence intervals, and McFadden pseudo-R<sup>2</sup>.

| Experiment              | Variable | Coef.  | SE Coef. | Z      | P      | OR     | 95% CI       | Mcfadden pseudo-R <sup>2</sup> |
|-------------------------|----------|--------|----------|--------|--------|--------|--------------|--------------------------------|
| Microsporidium sp. 505  |          |        |          |        |        |        |              |                                |
| October 2021            | Night    | -2.225 | 0.835    | -2.665 | 0.008  | 0.108  | 0.019-0.562  | 0.165                          |
|                         | Size     | 1.288  | 0.818    | 1.574  | 0.115  | 3.625  | 0.782-20.478 |                                |
|                         | Av. flow | 0.081  | 0.175    | 0.465  | 0.642  | 1.085  | 0.775-1.556  |                                |
| April 2021              | Night    | -1.183 | 0.862    | -1.297 | 0.195  | 0.327  | 0.070-2.397  | 0.221                          |
|                         | Size     | 2.390  | 0.762    | 3.139  | 0.002  | 10.916 | 3.068-58.191 |                                |
|                         | Av. flow | 0.126  | 0.105    | 1.198  | 0.231  | 1.134  | 0.926-1.405  |                                |
| Pooled samples          | Night    | -1.904 | 0.534    | -3.562 | <0.001 | 0.149  | 0.054-0.453  | 0.175                          |
|                         | Size     | 1.293  | 0.332    | 3.894  | <0.001 | 3.644  | 2.013-7.496  |                                |
|                         | Av. flow | -0.083 | 0.050    | -1.677 | 0.094  | 0.920  | 0.828-1.006  |                                |
| Microsporidium sp. 515  |          |        |          |        |        |        |              |                                |
| April 2021              | Night    | -2.080 | 0.586    | -3.549 | <0.001 | 0.125  | 0.041-0.426  | 0.117                          |
|                         | Size     | 0.785  | 0.270    | 2.908  | 0.004  | 2.193  | 1.349-3.961  |                                |
|                         | Av. flow | -0.096 | 0.076    | -1.262 | 0.207  | 0.909  | 0.780-1.051  |                                |
| July 2022               | Night    | -1.156 | 1.079    | -1.071 | 0.284  | 0.315  | 0.032-2.956  | 0.126                          |
|                         | Size     | 1.514  | 0.775    | 1.953  | 0.051  | 4.546  | 0.926-22.462 |                                |
|                         | Av. flow | 0.017  | 0.096    | 0.180  | 0.857  | 1.017  | 0.822-1.226  |                                |
| Pooled samples          | Night    | -1.198 | 0.457    | -2.623 | 0.009  | 0.302  | 0.129-0.792  | 0.058                          |
|                         | Size     | 0.567  | 0.195    | 2.900  | 0.004  | 1.762  | 1.216-2.628  |                                |
|                         | Av. flow | -0.035 | 0.029    | -1.211 | 0.226  | 0.965  | 0.908-1.019  |                                |
| Microsporidium sp. IV-B |          |        |          |        |        |        |              |                                |
| April 2021              | Night    | 0.928  | 0.520    | 1.783  | 0.075  | 2.528  | 0.983-7.861  | 0.178                          |
|                         | Size     | 1.112  | 0.124    | 8.992  | <0.001 | 3.041  | 2.414-3.927  |                                |
|                         | Av. flow | 0.019  | 0.033    | 0.576  | 0.565  | 1.019  | 0.956-1.087  |                                |
